# Supplementary material for: Plasma concentration and expression of adipokines in epicardial and subcutaneous adipose tissue are associated with impaired left ventricular filling pattern
Source: Springer Nature journal article supplement (doi:10.1186/s12967-019-2060-7), 2019-09-18

# Additional file 1

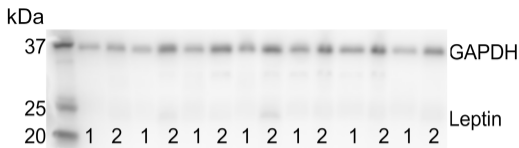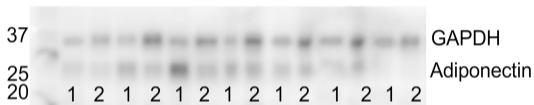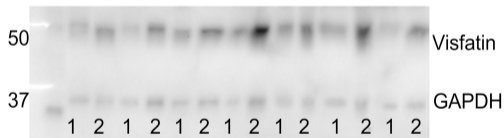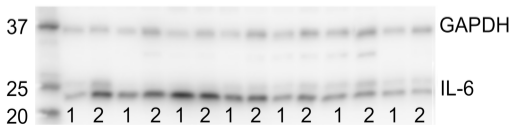

Supplement: MOESM1 [file 17185420]
